# Supplementary material for: Lentiviral Vector Production Titer Is Not Limited in HEK293T by Induced Intracellular Innate Immunity
Source: PubMed Central journal article supplement (PMC6965512; doi:10.1016/j.omtm.2019.11.021), 2019-12-24
Supplement: mmc1.pdf [file mmc1.pdf]

**OMTM, Volume 17**

## **Supplemental Information**

**Lentiviral Vector Production Titer**

**Is Not Limited in HEK293T by Induced**

**Intracellular Innate Immunity**

**Carolina B. Ferreira, Rebecca P. Sumner, Maria T. Rodriguez-Plata, Jane Rasaiyaah, Richard S. Milne, Adrian J. Thrasher, Waseem Qasim, and Greg J. Towers**

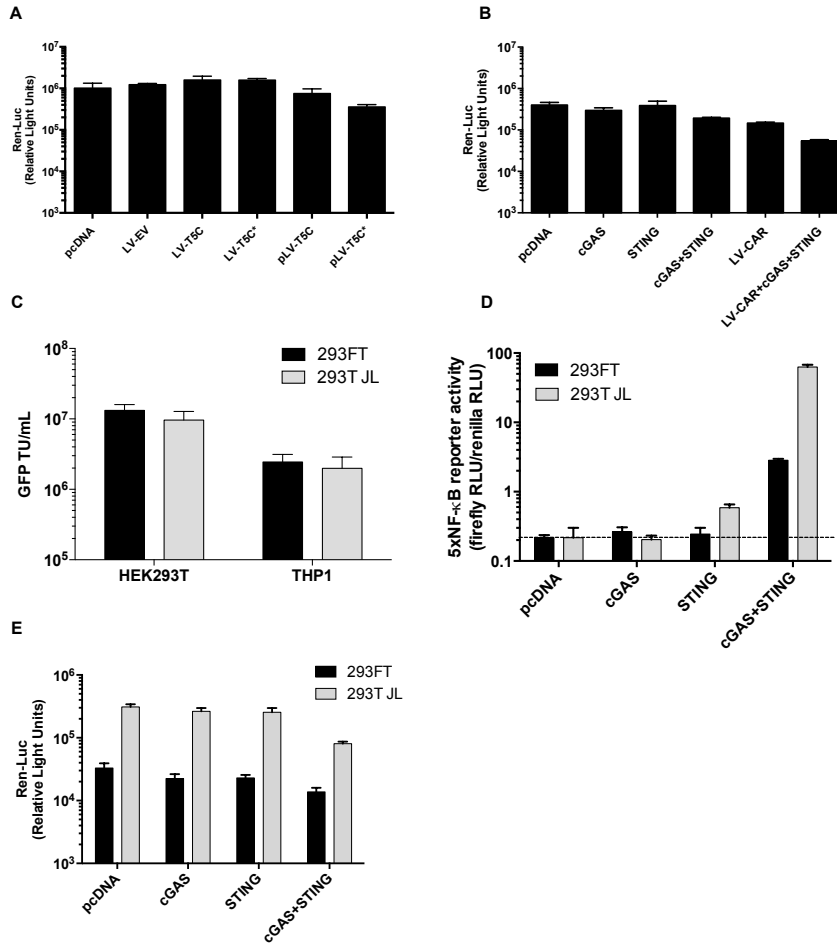

**Figure S1. Production of gene therapy LV in HEK 293T triggers NF-κB activation but does not impact LV yield.**

**(A)** *Renilla* luciferase readings for reporter gene assay data presented in Figure 1A (IgK reporter assay). HEK 293T were transfected with firefly luciferase reporter constructs, pRL-TK *Renilla* luciferase and empty pcDNA3 as a control or lentiviral vector constructs as described in Figure 1A. Luciferase activity was measured at 48 h post transfection. Data are presented as mean luminometry readings (relative lights units)  $\pm$  s.d. **(B)** *Renilla* luciferase readings for reporter gene assay data presented in Figure 1C (IgK reporter assay). HEK 293T were transfected with firefly luciferase reporter constructs, pRL-TK *Renilla* luciferase and empty pcDNA3 as a control or lentiviral vector constructs as described in Figure 1C. Luciferase activity was measured at 48 h post transfection. Data are presented as mean luminometry readings (relative lights units)  $\pm$  s.d. **(C)** Culture supernatants from HEK 293FT or HEK 293T JL cells that had been transfected to produce a GFP-encoding LV were harvested at 48 h and mean viral titres  $\pm$  s.d of biological replicates ( $n = 2$ ) were determined in quadruplicate in HEK 293T and THP-1 cells by enumerating GFP-positive cells. **TU** transducing units. **(D)** HEK 293FT or HEK 293T JL cells were transfected with 5xNF-κB firefly luciferase reporter construct, pRL-TK *Renilla* luciferase and pcDNA-based expression plasmids encoding cGAS and/or STING as shown. Mean reporter activity  $\pm$  s.d ( $n = 2$ ) was assessed 48 h later using a dual-luciferase reporter assay and is presented as firefly luciferase relative light units (RLU) divided by *Renilla* luciferase RLU. **(E)** *Renilla* luciferase readings for reporter gene assay data presented in Figure S1D.

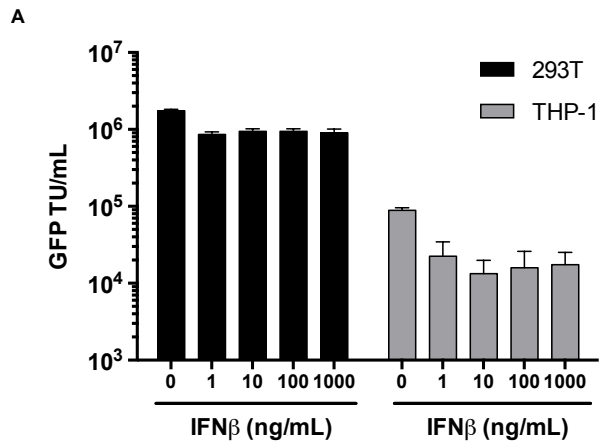

**Figure S2. Exogenous IFN $\beta$  reduces LV transduction efficiency on monocytic cells but not on HEK 293T or primary T cells.**

HEK 293T cells were used to produce GFP-encoding lentiviral vector in the absence or presence of increasing amounts of IFN $\beta$ . This experiment simulates the situation in which HEK 293T cells make IFN as a by-product of lentiviral vector production and secrete it into the LV prep. Culture supernatants were harvested at 48 h post transfection and viral titres  $\pm$  s.d. of biological replicates ( $n = 2$ ) were determined in duplicate by FACS of GFP-positive HEK 293T or THP-1 cells.

**Supplementary Table 1.** Taqman primers and probes

| <b>Primer/Probe</b> | <b>Sequence (5' – 3')</b>           | <b>Reference</b>                |
|---------------------|-------------------------------------|---------------------------------|
| Psi Fwd             | CAGGACTCGGCTTGCTGAAG                | Schott et al, 2019 <sup>1</sup> |
| Psi Rev             | TCCCCCGCTTAATACTGACG                | Schott et al, 2019 <sup>1</sup> |
| Psi Probe           | FAM-CGCACGGCAAGAGGCGAGG-TAMRA       | Schott et al, 2019 <sup>1</sup> |
| Albumin Fwd         | GCTGCTATCTCTTGTGGGCTGT              | Schott et al, 2019 <sup>1</sup> |
| Albumin Rev         | ACTCATGGGAGCTGCTGGTTC               | Schott et al, 2019 <sup>1</sup> |
| Albumin Probe       | VIC-CCTGTCATGCCACACAAATCTCTCC-TAMRA | Schott et al, 2019 <sup>1</sup> |

**Supplementary Table 2.** Real time PCR primers

| <b>Primer</b>   | <b>Sequence (5' – 3')</b>   | <b>Reference</b>                   |
|-----------------|-----------------------------|------------------------------------|
| hGAPDH Fwd      | ACCCAGAAGACTGTGGATGG        | Stuart et al, 2016 <sup>2</sup>    |
| hGAPDH Rev      | TTCTAGACGGCAGGTCAGGT        | Stuart et al, 2016 <sup>2</sup>    |
| IFN $\beta$ Fwd | AGGACAGGATGAACTTTGAC        | Gao et al, 2013 <sup>3</sup>       |
| IFN $\beta$ Rev | TGATAGACATTA GCC AGGAG      | Gao et al, 2013 <sup>3</sup>       |
| CXCL10 Fwd      | TGGCATTCAAGGAGTACCTC        | Gao et al, 2013 <sup>3</sup>       |
| CXCL10 Rev      | TTGTAGCAATGATCTCAACACG      | Gao et al, 2013 <sup>3</sup>       |
| ISG56 Fwd       | CCTCCTTGGGTTCTGCTACA        | Jakobsen et al, 2013 <sup>4</sup>  |
| ISG56 Rev       | GGCTGATATCTGGGTGCCTA        | Jakobsen et al, 2013 <sup>4</sup>  |
| ISG54 Fwd       | CAGCTGAGAATTGCACTGCAA       | Jiang et al, 2010 <sup>5</sup>     |
| ISG54 Rev       | CGTAGGCTGCTCTCCAAGGA        | Jiang et al, 2010 <sup>5</sup>     |
| TAg Fwd         | TGAGGCTACTGCTGACTCTCAACA    | Bergsagel et al, 1992 <sup>6</sup> |
| TAg Rev         | GCATGACTCAAAAACTTAGCAATTCTG | Bergsagel et al, 1992 <sup>6</sup> |

**Supplementary Table 3.** SV40 Large T antigen cloning primers

| <b>Primer</b> | <b>Sequence (5' – 3')</b>           | <b>Reference</b> |
|---------------|-------------------------------------|------------------|
| EcoRI-TAg Fwd | GCATGAATTCATGGATAAAGTTTTAAACAGAGAGG | This study       |
| TAg-NotI Rev  | ATGCGGCCGCTTATGTTTCAGGTTTCAGGGGG    | This study       |

**Supplementary Table 4.** shRNA target sequences

| <b>shRNA</b> | <b>shRNA target sequence (5' – 3')</b> | <b>Reference</b> |
|--------------|----------------------------------------|------------------|
| shTAg        | TGGGCAACAAACAGTGTAG                    | This study       |
| shControl    | ATGTCTCTGGAAAAGATGT                    | This study       |

## SUPPLEMENTAL REFERENCES

- 1 Schott, J. W. *et al.* Enhancing Lentiviral and Alpharetroviral Transduction of Human Hematopoietic Stem Cells for Clinical Application. *Molecular therapy. Methods & clinical development* **14**, 134-147, doi:10.1016/j.omtm.2019.05.015 (2019).
- 2 Stuart, J. H., Sumner, R. P., Lu, Y., Snowden, J. S. & Smith, G. L. Vaccinia Virus Protein C6 Inhibits Type I IFN Signalling in the Nucleus and Binds to the Transactivation Domain of STAT2. *PLoS Pathog* **12**, e1005955, doi:10.1371/journal.ppat.1005955 (2016).
- 3 Gao, D. X. *et al.* Cyclic GMP-AMP Synthase Is an Innate Immune Sensor of HIV and Other Retroviruses. *Science* **341**, 903-906, doi:10.1126/science.1240933 (2013).
- 4 Jakobsen, M. R. *et al.* IFI16 senses DNA forms of the lentiviral replication cycle and controls HIV-1 replication (vol 110, pg E4571, 2013). *Proceedings of the National Academy of Sciences of the United States of America* **110**, 19651-19651, doi:10.1073/pnas.1320190110 (2013).
- 5 Jiang, L., Saetre, P., Radomska, K. J., Jazin, E. & Lindholm Carlstrom, E. QKI-7 regulates expression of interferon-related genes in human astrocyte glioma cells. *PloS one* **5**, doi:10.1371/journal.pone.0013079 (2010).
- 6 Bergsagel, D. J., Finegold, M. J., Butel, J. S., Kupsky, W. J. & Garcea, R. L. DNA sequences similar to those of simian virus 40 in ependymomas and choroid plexus tumors of childhood. *N Engl J Med* **326**, 988-993, doi:10.1056/NEJM199204093261504 (1992).
